# Supplementary material for: Far-Red Light Coordinates the Diurnal Changes in the Transcripts Related to Nitrate Reduction, Glutathione Metabolism and Antioxidant Enzymes in Barley
Source: MDPI journal article supplement (doi:10.3390/ijms23137479), 2022-07-05
Supplement: s1 [file s1]

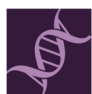

Supplementary materials

**Table S1.** Correlation values according to Guilford [69] between the transcription level of the evaluate genes related to different processes under normal white light.

|                | T<br>abl<br>e<br>S1 | Photorecep-<br>tors |                       |                       |                  | Circadian<br>clock |                  |                   | Redox-re-<br>sponsive<br>TFs |                              |                       | Nitrate reduction |                  |                  |                  | Glutathione<br>metabolism |                  |                   |             | Antioxidant enzymes |                  |                  |                  |                  |                  | Thiols      |             |                  |                       |             |                  |                   |
|----------------|---------------------|---------------------|-----------------------|-----------------------|------------------|--------------------|------------------|-------------------|------------------------------|------------------------------|-----------------------|-------------------|------------------|------------------|------------------|---------------------------|------------------|-------------------|-------------|---------------------|------------------|------------------|------------------|------------------|------------------|-------------|-------------|------------------|-----------------------|-------------|------------------|-------------------|
|                |                     | P<br>h<br>y<br>A    | C<br>r<br>y<br>1<br>a | C<br>r<br>y<br>1<br>b | C<br>r<br>y<br>2 | C<br>C<br>A<br>1   | T<br>O<br>C<br>1 | P<br>R<br>R<br>73 | O<br>X<br>S<br>2             | A<br>R<br>F<br>-<br>lik<br>e | m<br>T<br>R<br>E<br>F | N<br>R            | G<br>L<br>N<br>a | G<br>L<br>N<br>b | G<br>L<br>N<br>d | G<br>L<br>N<br>e          | A<br>P<br>S<br>R | γ-<br>E<br>C<br>S | G<br>S<br>T | G<br>R              | A<br>P<br>X<br>1 | A<br>P<br>X<br>4 | C<br>A<br>T<br>1 | C<br>A<br>T<br>2 | C<br>A<br>T<br>4 | P<br>R<br>X | C<br>y<br>S | C<br>y<br>S<br>S | Ec<br>yS/<br>Cys<br>s | G<br>S<br>H | G<br>S<br>S<br>G | EG<br>SH/<br>GSSG |
| Photoreceptors | Ph<br>yA            |                     | 0.20                  | 0.08                  | 0.036            | -0.022             | 0.070            | -0.006            | 0.016                        | 0.41                         | 0.12                  | -0.06             | -0.011           | 0.017            | 0.014            | 0.039                     | 0.099            | 0.037             | 0.022       | 0.060               | 0.011            | 0.012            | 0.051            | 0.036            | 0.017            | 0.048       | 0.011       | 0.019            | 0.014                 | 0.010       | 0.023            | 0.011             |
|                | Cr<br>yl<br>a       |                     |                       | 0.095                 | -0.006           | 0.054              | 0.006            | -0.005            | 0.047                        | 0.16                         | 0.84                  | 0.074             | 0.014            | 0.061            | 0.071            | 0.022                     | 0.006            | 0.033             | 0.024       | 0.006               | 0.067            | 0.050            | 0.001            | 0.031            | 0.062            | 0.016       | 0.006       | 0.026            | 0.018                 | 0.020       | 0.027            | 0.007             |
|                | Cr<br>yl<br>b       |                     |                       |                       | -0.008           | 0.064              | 0.004            | -0.001            | 0.050                        | 0.15                         | 0.89                  | 0.079             | 0.013            | 0.064            | 0.071            | 0.011                     | 0.006            | 0.030             | 0.010       | 0.022               | 0.067            | 0.051            | 0.007            | 0.030            | 0.067            | 0.008       | 0.021       | 0.038            | 0.029                 | 0.008       | 0.028            | 0.002             |

[illegible]

| A<br>RF<br>-<br>lik<br>e |                   |  |  |  |  |  |  |  |  | 0.<br>26         | -<br>0<br>.<br>2<br>8 | 0.<br>1<br>9 | 0.<br>2<br>8 | 0.<br>3<br>5 | 0.<br>4<br>9          | 0.<br>1<br>7 | 0.<br>6<br>2     | 0<br>.<br>7<br>9      | 0<br>.<br>8<br>3      | 0<br>.<br>6<br>7 | 0.<br>5<br>7 | -<br>0<br>.<br>1<br>4 | 0<br>.<br>1<br>5 | 0<br>.<br>2<br>0 | 0.<br>0<br>8          | -<br>0<br>.<br>0<br>8 | 0<br>.<br>3<br>0       | -<br>0<br>.<br>2<br>7 | -<br>0<br>.<br>3<br>3 |          |
|--------------------------|-------------------|--|--|--|--|--|--|--|--|------------------|-----------------------|--------------|--------------|--------------|-----------------------|--------------|------------------|-----------------------|-----------------------|------------------|--------------|-----------------------|------------------|------------------|-----------------------|-----------------------|------------------------|-----------------------|-----------------------|----------|
|                          | m<br>T<br>R<br>EF |  |  |  |  |  |  |  |  | 0<br>.<br>6<br>3 | 0.<br>2<br>3          | 0.<br>6<br>3 | 0.<br>7<br>3 | 0.<br>0<br>7 | 0.<br>1<br>0          | 0.<br>3<br>9 | 0<br>.<br>1<br>0 | 0<br>.<br>1<br>9      | 0.<br>6<br>5          | 0.<br>6<br>0     | 0.<br>0<br>5 | 0.<br>5<br>8          | 0<br>.<br>1<br>8 | 0<br>.<br>1<br>3 | -<br>0<br>.<br>3<br>0 | 0.<br>0<br>17         | -<br>0<br>.<br>1<br>8  | -<br>0<br>.<br>3<br>4 | 0.0<br>7              |          |
| Nitrate reduction        | N<br>R            |  |  |  |  |  |  |  |  |                  |                       | 0.<br>1<br>1 | 0.<br>6<br>3 | 0.<br>6<br>0 | -<br>0<br>.<br>1<br>2 | 0.<br>1<br>0 | 0.<br>1<br>6     | -<br>0<br>.<br>1<br>5 | 0<br>.<br>1<br>1      | 0.<br>4<br>1     | 0.<br>3<br>4 | -<br>0<br>.<br>4<br>4 | 0<br>.<br>0<br>8 | 0<br>.<br>1<br>0 | -<br>0<br>.<br>2<br>9 | 0.<br>0<br>22         | -<br>0<br>.<br>2<br>3  | 0.<br>0<br>2          | 0.1<br>6              |          |
|                          | G<br>L<br>Na      |  |  |  |  |  |  |  |  |                  |                       |              | 0.<br>2<br>7 | 0.<br>3<br>5 | 0.<br>6<br>5          | 0.<br>2<br>5 | 0.<br>4<br>4     | 0<br>.<br>1<br>7      | 0<br>.<br>3<br>7      | 0.<br>6<br>2     | 0.<br>3<br>0 | 0.<br>2<br>9          | 0.<br>4<br>8     | 0<br>.<br>4<br>4 | -<br>0<br>.<br>0<br>7 | 0.<br>0<br>2          | -<br>0<br>.<br>0<br>04 | -<br>0<br>.<br>1<br>5 | 0.<br>1<br>0          | 0.1<br>1 |
|                          | G<br>L<br>Nb      |  |  |  |  |  |  |  |  |                  |                       |              |              | 0.<br>9<br>1 | 0.<br>1<br>8          | 0.<br>0<br>0 | 0.<br>7<br>9     | 0<br>.<br>2<br>6      | 0<br>.<br>3<br>9      | 0.<br>7<br>4     | 0.<br>0<br>2 | 0.<br>7<br>7          | 0.<br>6<br>9     | 0<br>.<br>5<br>1 | 0<br>.<br>2<br>0      | -<br>0<br>.<br>3<br>4 | 0.<br>0<br>28          | -<br>0<br>.<br>1<br>2 | 0.<br>1<br>7          | 0.0<br>0 |
|                          | G<br>L<br>Nd      |  |  |  |  |  |  |  |  |                  |                       |              |              |              |                       | 0.<br>2<br>4 | 0.<br>0<br>9     | 0.<br>8<br>1          | -<br>0<br>.<br>0<br>. | 0<br>.<br>0<br>5 | 0.<br>8<br>6 | 0.<br>0<br>7          | 0.<br>7<br>0     | 0.<br>7<br>2     | 0<br>.<br>0<br>.      | 0<br>.<br>0<br>.      | -<br>0<br>.<br>0<br>.  | 0<br>.<br>0<br>.      | 0.1<br>1              |          |

[illegible]

|                     |              |  |  |  |  |  |  |  |  |  |  |  |  |  |  |  |  |  |  |              |              |              |              |             |              |              |                  |                  |                  |                  |
|---------------------|--------------|--|--|--|--|--|--|--|--|--|--|--|--|--|--|--|--|--|--|--------------|--------------|--------------|--------------|-------------|--------------|--------------|------------------|------------------|------------------|------------------|
| Antioxidant enzymes | AP<br>X1     |  |  |  |  |  |  |  |  |  |  |  |  |  |  |  |  |  |  | 0.<br>8<br>2 | -<br>0<br>5  | 0.<br>6<br>8 | 0.<br>7<br>7 | 0<br>6<br>1 | 0<br>1<br>9  | -<br>0<br>3  | -<br>0<br>28     | -<br>0<br>1<br>0 | -<br>0<br>3<br>0 | -<br>0<br>0<br>3 |
|                     | AP<br>X4     |  |  |  |  |  |  |  |  |  |  |  |  |  |  |  |  |  |  | 0.<br>0<br>7 | 0.<br>5<br>6 | 0.<br>6<br>3 | 0<br>5<br>3  | 0<br>0<br>7 | 0.<br>4<br>3 | -<br>0<br>18 | -<br>0<br>2<br>0 | -<br>0<br>3<br>2 | 0.0<br>7         |                  |
|                     | C<br>A<br>T1 |  |  |  |  |  |  |  |  |  |  |  |  |  |  |  |  |  |  |              | 0.<br>4<br>1 | 0.<br>1<br>7 | 0<br>0<br>9  | 0<br>0<br>9 | 0.<br>2<br>9 | 0.<br>16     | -<br>0<br>3      | -<br>0<br>1      | 0.0<br>2         |                  |
|                     | C<br>A<br>T2 |  |  |  |  |  |  |  |  |  |  |  |  |  |  |  |  |  |  |              |              | 0.<br>3<br>4 | 0.<br>5<br>0 | 0<br>2<br>0 | 0.<br>9      | -<br>0<br>25 | 0<br>0<br>3      | 0.<br>2<br>5     | -<br>0<br>4      |                  |
|                     | C<br>A<br>T4 |  |  |  |  |  |  |  |  |  |  |  |  |  |  |  |  |  |  |              |              |              | 0<br>4<br>3  | 0<br>2<br>0 | 0.<br>3      | -<br>0<br>31 | 0<br>1<br>4      | -<br>0<br>9      | 0.0<br>6         |                  |
|                     | PR<br>X      |  |  |  |  |  |  |  |  |  |  |  |  |  |  |  |  |  |  |              |              |              |              |             | 0<br>0<br>.  | 0.<br>6      | 0.<br>03         | -<br>0<br>.      | 0.<br>1<br>4     | 0.1<br>5         |

[illegible]

\* If correlation value is: < 0.20 - slight; almost negligible relationship; 0.20 - 0.40 - low correlation; definite but small relationship; 0.40 - 0.70 - moderate correlation; substantial relationship (green cells); 0.70 - 0.90 - high correlation; marked relationship (brown cells); 0.90 - 1.00 - very high correlation; very dependable relationship (black cells).

**Table S2.** Correlation values according to Guilford [69] between the transcription level of the evaluate genes related to different processes under additional blue light.

| Table S2       | Photoreceptors |       |       |      | Circadian clock |       |       |      | Redox-responsive TFs |       |      | Nitrate reduction |      |      |      | Glutathione metabolism |      |      |       | Antioxidant enzymes |      |      |      |       |      | Thiols |       |          |       |       |            |
|----------------|----------------|-------|-------|------|-----------------|-------|-------|------|----------------------|-------|------|-------------------|------|------|------|------------------------|------|------|-------|---------------------|------|------|------|-------|------|--------|-------|----------|-------|-------|------------|
|                | PhyA           | Cry1a | Cry1b | Cry2 | CYC1            | CYC2  | PRR73 | ORF2 | ARF-like             | mTRF  | NR   | GLN               | GLN  | GLN  | GLN  | APSR                   | γ-EC | GST  | GR    | APX1                | APX4 | CAT1 | CAT2 | CAT4  | PXR  | CysS   | CysS  | ECS/CysS | GSH   | GS SG | ECS H/GSSG |
| Photoreceptors | PhyA           | 0.81  | 0.80  | 0.14 | 0.17            | -0.10 | 0.12  | 0.09 | 0.64                 | 0.63  | 0.14 | -0.05             | 0.34 | 0.36 | 0.15 | -0.04                  | 0.30 | 0.03 | -0.28 | 0.23                | 0.00 | 0.14 | 0.40 | -0.32 | 0.06 | 0.03   | -0.08 | 0.03     | -0.33 | 0.06  | 0.00       |
|                | Cry1a          |       | 0.98  | 0.01 | 0.54            | -0.29 | 0.09  | 0.04 | 0.31                 | 0.75  | 0.26 | -0.03             | 0.53 | 0.55 | 0.15 | -0.04                  | 0.24 | 0.03 | -0.44 | 0.42                | 0.05 | 0.21 | 0.00 | 0.11  | 0.03 | 0.00   | 0.00  | 0.00     | 0.40  | -0.01 | 0.12       |
|                | Cry1b          |       |       | 0.01 | 0.62            | -0.34 | 0.10  | 0.08 | 0.34                 | 0.75  | 0.31 | -0.04             | 0.49 | 0.57 | 0.16 | -0.05                  | 0.24 | 0.03 | -0.38 | 0.47                | 0.11 | 0.21 | 0.11 | 0.10  | 0.03 | 0.13   | 0.30  | 0.00     | 0.42  | -0.04 | 0.13       |
|                | Cry2           |       |       |      | -0.32           | 0.33  | 0.65  | 0.26 | 0.28                 | -0.12 | 0.31 | 0.00              | 0.21 | 0.31 | 0.20 | -0.05                  | 0.41 | 0.00 | -0.42 | 0.41                | 0.05 | 0.51 | 0.24 | 0.66  | 0.09 | 0.01   | 0.13  | 0.00     | 0.03  | -0.07 | 0.05       |
| Circadian      | CC1            |       |       |      |                 | -0.58 | -0.20 | 0.10 | -0.35                | 0.33  | 0.49 | -0.03             | 0.40 | 0.42 | 0.20 | -0.07                  | 0.11 | 0.08 | -0.42 | 0.45                | 0.45 | 0.43 | 0.13 | 0.43  | 0.01 | 0.17   | 0.25  | 0.02     | 0.45  | -0.06 | 0.20       |

|                      | TO<br>C1         |  |  |  |  |  |  | -<br>0.0<br>6 | 0.2<br>4 |               | -<br>0.25<br>03 | -<br>0.1<br>6 | -<br>0.0<br>4 | -<br>0.0<br>5 | 0.1<br>0      | 0.3<br>6      | 0.4<br>0      | 0.<br>15      | 0.<br>65       | -<br>0.2<br>8 | -<br>0.1<br>9 | 0.4<br>3      | 0.2<br>5 | -<br>0.4<br>7 | -<br>0.<br>08 | -<br>0.<br>07 | 0.<br>32      | 0.1<br>9 | 0.<br>28  | 0.3<br>7 | -<br>0.03 |
|----------------------|------------------|--|--|--|--|--|--|---------------|----------|---------------|-----------------|---------------|---------------|---------------|---------------|---------------|---------------|---------------|----------------|---------------|---------------|---------------|----------|---------------|---------------|---------------|---------------|----------|-----------|----------|-----------|
|                      |                  |  |  |  |  |  |  | -<br>0.4<br>1 |          | -<br>0.<br>08 | -<br>0.02<br>30 | 0.3<br>6      | 0.3<br>3      | 0.3<br>3      | 0.1<br>9      | 0.1<br>2      | 0.0<br>5      | 0.<br>36      | 0.<br>10       | 0.3<br>2      | 0.1<br>0      | 0.3<br>3      | 0.0<br>7 | 0.2<br>3      | 0.<br>20      | 0.<br>05      | 0.<br>18      | 0.0<br>1 | 0.<br>37  | 0.1<br>8 | 0.00      |
| Redox-responsive FEs | OX<br>S2         |  |  |  |  |  |  |               |          | -<br>0.<br>77 | -<br>0.08       | -<br>0.0<br>9 | 0.5<br>7      | 0.4<br>4      | 0.8<br>0      | 0.2<br>5      | 0.4<br>8      | -<br>0.<br>22 | 0.<br>14       | 0.1<br>1      | 0.0<br>6      | -<br>0.0<br>7 | 0.3<br>0 | 0.2<br>7      | 0.<br>05      | -<br>0.<br>42 | 0.<br>09      | 0.3<br>5 | 0.<br>22  | 0.1<br>4 | 0.31      |
|                      | AR<br>F-<br>like |  |  |  |  |  |  |               |          | 0.51          | -<br>0.<br>19   | -<br>0.2<br>5 | 0.1<br>4      | 0.0<br>8      | 0.1<br>4      | -<br>0.4<br>0 | 0.2<br>2      | 0.<br>09      | 0.<br>09       | 0.1<br>8      | -<br>0.2<br>5 | 0.3<br>8      | 0.3<br>4 | -<br>0.5<br>5 | -<br>0.<br>26 | 0.<br>08      | -<br>0.<br>06 | 0.1<br>4 | 0.<br>10  | 0.1<br>7 | -<br>0.16 |
|                      | mT<br>REF        |  |  |  |  |  |  |               |          |               | 0.<br>03        | 0.2<br>3      | 0.4<br>5      | 0.4<br>0      | 0.0<br>0      | 0.4<br>8      | 0.0<br>4      | 0.<br>06      | 0.<br>47       | 0.4<br>3      | 0.0<br>7      | -<br>0.0<br>9 | 0.0<br>8 | 0.1<br>1      | 0.<br>49      | 0.<br>06      | 0.<br>12      | 0.0<br>5 | 0.<br>22  | 0.2<br>2 | 0.09      |
|                      |                  |  |  |  |  |  |  |               |          |               |                 | -<br>0.1<br>1 | 0.7<br>1      | 0.7<br>0      | 0.9<br>2      | 0.2<br>1      | 0.2<br>4      | -<br>0.<br>04 | 0.<br>09       | 0.1<br>5      | 0.2<br>1      | 0.3<br>1      | 0.0<br>8 | 0.4<br>1      | -<br>0.<br>06 | -<br>0.<br>34 | 0.<br>08      | 0.<br>7  | 0.3<br>26 | 0.0<br>5 | 0.23      |
| Nitrate reduction    | GL<br>Na         |  |  |  |  |  |  |               |          |               |                 |               | -<br>0.2<br>7 | -<br>0.2<br>5 | -<br>0.0<br>3 | -<br>0.0<br>4 | -<br>0.0<br>8 | -<br>0.<br>32 | -<br>0.0<br>12 | 0.3<br>4      | 0.3<br>3      | 0.1<br>3      | 0.3<br>4 | 0.<br>07      | -<br>0.<br>08 | 0.<br>24      | 0.1<br>5      | 0.<br>08 | 0.1<br>3  | 0.10     |           |
|                      | GL<br>Nb         |  |  |  |  |  |  |               |          |               |                 |               |               | 0.8<br>7      | 0.6<br>1      | 0.2<br>6      | 0.4<br>8      | -<br>0.<br>14 | 0.<br>26       | 0.6<br>0      | 0.2<br>1      | -<br>0.1<br>6 | 0.1<br>2 | 0.2<br>0      | -<br>0.<br>29 | -<br>0.<br>41 | 0.<br>00      | 0.3<br>9 | 0.<br>38  | 0.35     |           |
|                      | GL<br>Nd         |  |  |  |  |  |  |               |          |               |                 |               |               |               | 0.6<br>2      | 0.2<br>4      | 0.3<br>5      | 0.<br>11      | 0.<br>25       | 0.6<br>1      | 0.2<br>5      | -<br>0.2<br>8 | 0.0<br>0 | 0.2<br>8      | 0.<br>18      | -<br>0.<br>28 | 0.<br>10      | 0.3<br>5 | 0.<br>28  | 0.0<br>2 | 0.19      |
|                      |                  |  |  |  |  |  |  |               |          |               |                 |               |               |               |               |               |               |               |                |               |               |               |          |               |               |               |               |          |           |          |           |



|                        |           |  |  |  |  |  |  |  |  |  |  |  |  |  |  |  |          |               |          |          |               |               |               |               |          |                |                |                |                |           |          |          |
|------------------------|-----------|--|--|--|--|--|--|--|--|--|--|--|--|--|--|--|----------|---------------|----------|----------|---------------|---------------|---------------|---------------|----------|----------------|----------------|----------------|----------------|-----------|----------|----------|
|                        | GL<br>Ne  |  |  |  |  |  |  |  |  |  |  |  |  |  |  |  | 0.2<br>6 | 0.3<br>6      | -<br>04  | -<br>09  | 0.0<br>2      | -<br>4        | -<br>0        | 0.0<br>1      | 0.3<br>4 | -<br>16        | -<br>42        | 0.<br>22       | 0.4<br>4       | -<br>24   | 0.<br>8  | 0.35     |
| Glutathione metabolism | APS<br>R  |  |  |  |  |  |  |  |  |  |  |  |  |  |  |  |          | -<br>0.3<br>2 | 0.<br>16 | 0.<br>17 | -<br>0.5<br>3 | -<br>0.1<br>8 | -<br>0.0<br>1 | -<br>0.1<br>5 | 0.2<br>1 | 0.<br>09       | -<br>0.1<br>10 | 0.<br>36       | 0.1<br>9       | 0.<br>29  | 0.3<br>7 | 0.02     |
|                        | γ-<br>ECS |  |  |  |  |  |  |  |  |  |  |  |  |  |  |  |          | 0.<br>01      | 0.<br>29 | 0.1<br>0 | 0.0<br>8      | 0.3<br>5      | 0.4<br>3      | 0.3<br>1      | 0.<br>22 | 0.<br>27       | 0.<br>02       | 0.1<br>8       | 0.<br>15       | 0.0<br>6  | 0.24     |          |
|                        | GST       |  |  |  |  |  |  |  |  |  |  |  |  |  |  |  |          | 0.<br>03      | 0.2<br>5 | 0.0<br>8 | 0.0<br>5      | 0.0<br>8      | 0.1<br>7      | 0.<br>04      | 0.<br>33 | 0.<br>03       | 0.2<br>3       | 0.<br>29       | 0.0<br>5       | -<br>0.40 |          |          |
|                        | GR        |  |  |  |  |  |  |  |  |  |  |  |  |  |  |  |          | 0.2<br>2      | 0.0<br>8 | 0.3<br>0 | 0.6<br>6      | 0.2<br>9      | 0.<br>22      | 0.<br>10      | 0.<br>30 | 0.1<br>6       | 0.<br>32       | 0.3<br>5       | -<br>0.03      |           |          |          |
|                        |           |  |  |  |  |  |  |  |  |  |  |  |  |  |  |  |          |               |          |          |               |               |               |               |          |                |                |                |                |           |          |          |
| Antioxidant enzymes    | AP<br>X1  |  |  |  |  |  |  |  |  |  |  |  |  |  |  |  |          |               |          |          |               | 0.4<br>7      | -<br>0.3<br>0 | 0.0<br>8      | 0.2<br>5 | -<br>0.1<br>12 | -<br>0.1<br>24 | 0.<br>05       | 0.2<br>6       | 0.<br>24  | 0.0<br>2 | 0.25     |
|                        | AP<br>X4  |  |  |  |  |  |  |  |  |  |  |  |  |  |  |  |          |               |          |          |               |               | 0.2<br>4      | 0.0<br>4      | 0.3<br>8 | 0.<br>02       | -<br>0.1<br>32 | 0.<br>08       | 0.3<br>8       | 0.<br>06  | 0.0<br>7 | 0.17     |
|                        | CA<br>T1  |  |  |  |  |  |  |  |  |  |  |  |  |  |  |  |          |               |          |          |               |               |               | 0.1<br>4      | 0.4<br>8 | 0.<br>19       | 0.<br>18       | 0.<br>15       | 0.1<br>2       | 0.<br>03  | 0.0<br>7 | 0.14     |
|                        | CA<br>T2  |  |  |  |  |  |  |  |  |  |  |  |  |  |  |  |          |               |          |          |               |               |               |               |          | -<br>0.2<br>9  | -<br>0.1<br>14 | -<br>0.1<br>21 | -<br>0.1<br>02 | 0.0<br>4  | 0.<br>06 | 0.0<br>0 |

|       |                             |  |  |  |  |  |  |  |  |  |  |  |  |  |  |  |  |  |  |  |  |  |  |          |          |          |          |           |          |   |      |
|-------|-----------------------------|--|--|--|--|--|--|--|--|--|--|--|--|--|--|--|--|--|--|--|--|--|--|----------|----------|----------|----------|-----------|----------|---|------|
| Thiol | CA<br>T4                    |  |  |  |  |  |  |  |  |  |  |  |  |  |  |  |  |  |  |  |  |  |  | 0.<br>18 | -<br>21  | 0.<br>11 | 0.2<br>9 | -<br>04   | 0.1<br>1 |   | 0.14 |
|       | PR<br>X                     |  |  |  |  |  |  |  |  |  |  |  |  |  |  |  |  |  |  |  |  |  |  |          | 0.<br>28 | 0.<br>08 | 0.2<br>0 | 0.<br>10  | 0.0<br>2 | - | 0.23 |
|       | CyS                         |  |  |  |  |  |  |  |  |  |  |  |  |  |  |  |  |  |  |  |  |  |  |          |          | 0.<br>46 | -<br>0   | 0.9<br>30 | 0.<br>8  | - | 0.88 |
|       | CyS<br>S                    |  |  |  |  |  |  |  |  |  |  |  |  |  |  |  |  |  |  |  |  |  |  |          |          |          | 0.7<br>3 | 0.<br>52  | 0.9<br>2 |   | 0.48 |
|       | E <sub>CyS</sub> /<br>CySS  |  |  |  |  |  |  |  |  |  |  |  |  |  |  |  |  |  |  |  |  |  |  |          |          |          |          | -<br>02   | 0.7<br>3 |   | 0.81 |
|       | GS<br>H                     |  |  |  |  |  |  |  |  |  |  |  |  |  |  |  |  |  |  |  |  |  |  |          |          |          |          |           | 0.5<br>4 | - | 0.35 |
|       | GSS<br>G                    |  |  |  |  |  |  |  |  |  |  |  |  |  |  |  |  |  |  |  |  |  |  |          |          |          |          |           |          |   | 0.53 |
|       | E <sub>GSH</sub> /<br>/GSSG |  |  |  |  |  |  |  |  |  |  |  |  |  |  |  |  |  |  |  |  |  |  |          |          |          |          |           |          |   |      |

\* If correlation value is: <0.20 - slight; almost negligible relationship; 0.20 - 0.40 - low correlation; definite but small relationship; 0.40 - 0.70 - moderate correlation; substantial relationship (green cells); 0.70 - 0.90 - high correlation; marked relationship (brown cells); 0.90 - 1.00 - very high correlation; very dependable relationship (black cells).

**Table S3.** Correlation values according to Guilford [69] between the transcription level of the evaluate genes related to different processes under additional far-red light.

|                 | Table S3 | Photoreceptors |       |       |      | Circadian clock |      |      | Redox-responsive TFs |          |      | Nitrate reduction |      |      |      | Glutathione metabolism |      |      |      | Antioxidant enzymes |      |      |      |      |      | Thiols |      |      |       |      |       |          |
|-----------------|----------|----------------|-------|-------|------|-----------------|------|------|----------------------|----------|------|-------------------|------|------|------|------------------------|------|------|------|---------------------|------|------|------|------|------|--------|------|------|-------|------|-------|----------|
|                 |          | PhyA           | Cry1a | Cry1b | Cry2 | CcA1            | ToC1 | PR73 | OXS2                 | ARF-like | mTRF | NR                | GLNa | GLNb | GLNd | GLNe                   | APSR | γ-EC | GS   | GR                  | APX1 | APX4 | CAT1 | CAT2 | CAT4 | Perox  | CysS | CysS | ECysS | GSH  | GS SG | EGSHGSSG |
| Photoreceptors  | PhyA     |                | 0.21  | 0.26  | 0.34 | 0.15            | 0.02 | 0.15 | 0.03                 | 0.20     | 0.18 | 0.02              | 0.22 | 0.05 | 0.06 | 0.09                   | 0.41 | 0.04 | 0.14 | 0.04                | 0.10 | 0.10 | 0.13 | 0.01 | 0.14 | 0.20   | 0.47 | 0.10 | 0.37  | 0.16 | 0.26  | 0.31     |
|                 | Cry1a    |                |       | 0.92  | 0.04 | 0.47            | 0.08 | 0.06 | 0.39                 | 0.08     | 0.63 | 0.44              | 0.24 | 0.43 | 0.25 | 0.02                   | 0.26 | 0.19 | 0.20 | 0.16                | 0.43 | 0.30 | 0.10 | 0.24 | 0.42 | 0.16   | 0.21 | 0.48 | 0.40  | 0.10 | 0.28  | 0.09     |
|                 | Cry1b    |                |       |       | 0.11 | 0.49            | 0.21 | 0.02 | 0.45                 | 0.04     | 0.64 | 0.50              | 0.23 | 0.47 | 0.23 | 0.18                   | 0.16 | 0.19 | 0.01 | 0.13                | 0.51 | 0.31 | 0.07 | 0.29 | 0.47 | 0.13   | 0.45 | 0.55 | 0.05  | 0.47 | 0.30  |          |
|                 | Cry2     |                |       |       |      | 0.24            | 0.04 | 0.60 | 0.31                 | 0.13     | 0.06 | 0.41              | 0.16 | 0.33 | 0.19 | 0.29                   | 0.06 | 0.09 | 0.72 | 0.03                | 0.33 | 0.14 | 0.28 | 0.23 | 0.22 | 0.16   | 0.11 | 0.00 | 0.02  | 0.25 | 0.20  |          |
| Circadian clock | CC A1    |                |       |       |      |                 | 0.29 | 0.15 | 0.42                 | 0.22     | 0.36 | 0.48              | 0.25 | 0.44 | 0.28 | 0.24                   | 0.63 | 0.13 | 0.13 | 0.03                | 0.37 | 0.38 | 0.25 | 0.19 | 0.52 | 0.31   | 0.14 | 0.23 | 0.33  | 0.21 | 0.25  | 0.05     |
|                 | TO C1    |                |       |       |      |                 |      | 0.09 | 0.52                 | 0.44     | 0.08 | 0.27              | 0.30 | 0.52 | 0.68 | 0.37                   | 0.19 | 0.76 | 0.06 | 0.74                | 0.53 | 0.54 | 0.16 | 0.66 | 0.28 | 0.41   | 0.05 | 0.01 | 0.06  | 0.17 | 0.14  |          |

[illegible]

|                        |       |  |  |  |  |  |  |  |  |  |  |  |  |  |  |  |      |       |      |      |      |      |      |      |      |      |      |      |      |      |      |
|------------------------|-------|--|--|--|--|--|--|--|--|--|--|--|--|--|--|--|------|-------|------|------|------|------|------|------|------|------|------|------|------|------|------|
| Glutathione metabolism | APSR  |  |  |  |  |  |  |  |  |  |  |  |  |  |  |  | 0.40 | 0.10  | 0.50 | 0.33 | 0.46 | 0.10 | 0.33 | 0.59 | 0.54 | -09  | -35  | -00  | -02  | -01  | -003 |
|                        | γ-ECS |  |  |  |  |  |  |  |  |  |  |  |  |  |  |  | -08  | 0.091 | 0.87 | 0.93 | 0.28 | 0.96 | 0.74 | 0.56 | -06  | -24  | -05  | 0.09 | 0.26 | 0.18 |      |
|                        | GST   |  |  |  |  |  |  |  |  |  |  |  |  |  |  |  | 0.02 | 0.36  | 0.09 | 0.26 | 0.25 | 0.17 | 0.09 | 0.37 | 0.18 | 0.04 | 0.17 | 0.28 | 0.34 |      |      |
|                        | GR    |  |  |  |  |  |  |  |  |  |  |  |  |  |  |  |      |       | 0.71 | 0.78 | 0.50 | 0.84 | 0.72 | 0.67 | 0.01 | -27  | -04  | 0.15 | 0.27 | 0.19 |      |
| Antioxidant enzymes    | APX1  |  |  |  |  |  |  |  |  |  |  |  |  |  |  |  |      |       |      | 0.89 | 0.04 | 0.94 | 0.79 | 0.48 | -10  | -26  | -06  | 0.10 | 0.42 | 0.30 |      |
|                        | APX4  |  |  |  |  |  |  |  |  |  |  |  |  |  |  |  |      |       |      | 0.12 | 0.93 | 0.85 | 0.58 | -08  | -33  | -07  | 0.06 | 0.31 | 0.18 |      |      |
|                        | CAT1  |  |  |  |  |  |  |  |  |  |  |  |  |  |  |  |      |       |      |      | 0.21 | 0.13 | 0.23 | -11  | -11  | -09  | 0.36 | 0.29 | 0.31 |      |      |
|                        | CAT2  |  |  |  |  |  |  |  |  |  |  |  |  |  |  |  |      |       |      |      |      | 0.80 | 0.57 | -06  | -26  | -06  | 0.14 | 0.39 | 0.28 |      |      |
|                        | CAT4  |  |  |  |  |  |  |  |  |  |  |  |  |  |  |  |      |       |      |      |      |      | 0.74 | -10  | -42  | -05  | 0.08 | 0.44 | 0.25 |      |      |

[illegible]

\* If correlation value is: < 0.20 - slight; almost negligible relationship; 0.20 - 0.40 - low correlation; definite but small relationship; 0.40 - 0.70 - moderate correlation; substantial relationship (green cells); 0.70 - 0.90 - high correlation; marked relationship (brown cells); 0.90 - 1.00 - very high correlation; very dependable relationship (black cells).

**Table S4.** Primer sequences of the target genes and their origin used for qPCR analysis.

| Target Gene           | Gene ID (NCBI nr)                                      | Ensembl Plants ID    | Strand  | Primer Sequences (5' → 3')   |
|-----------------------|--------------------------------------------------------|----------------------|---------|------------------------------|
| <i>HvCyclophilin*</i> | AK253120.1                                             | HORVU6Hr1G01257<br>0 | Forward | CCTGTCGTGTCGTCTCTAA<br>A     |
|                       |                                                        |                      | Reverse | ACGCAGATCCAGCAGCCTAA<br>AG   |
| <i>HvPHYA</i>         | DQ201139.1<br>DQ201140.1,<br>GU994113.1,<br>GU994114.1 | HORVU4Hr1G00861<br>0 | Forward | TGCAGCACATTCAGAGAGGG         |
|                       |                                                        |                      | Reverse | CCCTAGTGCCTTGTGCAGAG         |
| <i>HvCRY1a</i>        | DQ201149.1<br>DQ201150.1<br>DQ201151.1                 | not available        | Forward | CACATGGAAGTGGACCGTGC         |
|                       |                                                        |                      | Reverse | CGCTGGCAACTTGTTCCTG          |
| <i>HvCRY1b</i>        | DQ201152.1<br>DQ201153.1<br>DQ201154.1                 | not available        | Forward | GATGGAAGTCCATTGGGAACC        |
|                       |                                                        |                      | Reverse | CATACGGTGCTGAGGTTGCTG        |
| <i>HvCRY2</i>         | DQ201155.1<br>DQ201156.1                               | HORVU6Hr1G05874<br>0 | Forward | GGCTCGCGAGTGCTTAGATG         |
|                       |                                                        |                      | Reverse | GGAGCACTTGGAGATAGTTCC<br>TTC |
| <i>HvCCA1</i>         | JN603242.1                                             | HORVU7Hr1G07087<br>0 | Forward | AATAAGACTGGGGCAACTGG<br>C    |
|                       |                                                        |                      | Reverse | TAGTTGTGGGAAAGGGCTG          |
| <i>HvTOC1</i>         | JN603243.1                                             | HORVU6Hr1G05763<br>0 | Forward | AGGCAGAAAAGGAAGGACCG         |
|                       |                                                        |                      | Reverse | TGCCTAACAACTGACCCCG          |
| <i>HvPRR73</i>        | AK356430.1                                             | HORVU5Hr1G08162<br>0 | Forward | GGTGAAGGGTCAGTTTGT           |
|                       |                                                        |                      | Reverse | ACGACAAGTTAGCGTATACAA        |
| <i>HvOXS2</i>         | AK375304.1                                             | HORVU4Hr1G00577<br>0 | Forward | TCTGGGTCGCCAATGAATC          |
|                       |                                                        |                      | Reverse | GCTCCTCATTGTCTGCTGGT         |
| <i>HvARF-like</i>     | AK358522.1                                             | HORVU4Hr1G01174<br>0 | Forward | GATGGGTGTATGTGTGTA           |
|                       |                                                        |                      | Reverse | CTTGCTCTGAGGCTGTTAT          |
| <i>HomTREF</i>        | AK360739.1                                             | HORVU5Hr1G10338<br>0 | Forward | CGACCATGGTTTGTGATGTA         |
|                       |                                                        |                      | Reverse | CCTATACACATGGCACATCC         |
| <i>HvNR</i>           | AK365506.1                                             |                      | Forward | ACGTGGAGCTGCTCATCAAG         |

|                |               |                      |         |                             |
|----------------|---------------|----------------------|---------|-----------------------------|
|                |               | HORVU6Hr1G07970<br>0 | Reverse | TCGAGGTACTGCGACATGAG        |
| <i>HvGLN_a</i> | AK252215.1    | HORVU1Hr1G03806<br>0 | Forward | TTTGATGGGTGCGCAAATCC        |
|                |               |                      | Reverse | GGTGAATGAGATCGCCAAAT<br>GC  |
| <i>HvGLN_b</i> | AK365634.1    | HORVU2Hr1G11130<br>0 | Forward | ATTTGCGCACATTGCTCTGC        |
|                |               |                      | Reverse | CAGCGCATCCTTCAAGTTGTT<br>G  |
| <i>HvGLN_d</i> | JX878490.1    | HORVU4Hr1G06686<br>0 | Forward | TCGACATCAGGAGCAAAGCA<br>AG  |
|                |               |                      | Reverse | CTGAACGGGTCTTGAATAATG<br>G  |
| <i>HvGLN_e</i> | KF815944.1    | HORVU6Hr1G07403<br>0 | Forward | TATTTTGCTGACGGCGAACG        |
|                |               |                      | Reverse | ATTCAGGAGCAAGAAGGCCA<br>AG  |
| <i>HvAPSR</i>  | not available | not available        | Forward | TCGCCTCTGAGATCATGGA         |
|                |               |                      | Reverse | GTCCAGTCAGCTTCGCGTAT        |
| <i>Hvγ-ECS</i> | AK353769.1    | HORVU1Hr1G01559<br>0 | Forward | TGCCCCACTTTGAACGATTGG       |
|                |               |                      | Reverse | TCCCGGAATGGTGTCTTCAAA<br>C  |
| <i>HvGST</i>   | AK251838.1    | HORVU5Hr1G10343<br>0 | Forward | CGGAAGGAAGCTACAGATAA<br>A   |
|                |               |                      | Reverse | GACACATGACACACACATAG<br>A   |
| <i>HvGR</i>    | AK376974.1    | HORVU6Hr1G08978<br>0 | Forward | TGGAGGCTACTTGCTTTGCT        |
|                |               |                      | Reverse | AGATAGCGGCGGAATACAGA        |
| <i>HvAPX1</i>  | MF804856.1    | HORVU7Hr1G05743<br>0 | Forward | CAGTGGCCCAGCATCTACAA        |
|                |               |                      | Reverse | TAGCCCGCGATAACTACAGC        |
| <i>HvAPX4</i>  | AK356559.1    | HORVU2Hr1G10173<br>0 | Forward | AGGCCCCATTTCAATTTGCAG       |
|                |               |                      | Reverse | CGCCCGAATATTTGTCTGAAG       |
| <i>HvCAT1</i>  | AF021939.1    | HORVU6Hr1G00864<br>0 | Forward | AAGTGC GGCTTCAAGAACAA<br>CC |



|               |            |                      |         |                             |
|---------------|------------|----------------------|---------|-----------------------------|
|               |            |                      | Reverse | TCGTCTTCTCCCTCTTTCCAAC<br>C |
| <i>HvCAT2</i> | AK366177.1 | HORVU7Hr1G12170<br>0 | Forward | CGCGGAAAATGAACAGCTTG        |
|               |            |                      | Reverse | GAGCACATTTCGGGGCATTC        |
| <i>HvCAT4</i> | AK357533.1 | HORVU4Hr1G08204<br>0 | Forward | CAACCGCAACATCGACAACCTT<br>C |
|               |            |                      | Reverse | TTGTTGTGGTGGGAGCACTTG       |
| <i>HvPRX1</i> | AK248281.1 | HORVU3Hr1G07758<br>0 | Forward | AGGCAACAAGAAGGACGAAA<br>CG  |
|               |            |                      | Reverse | ACGTACGCGCTGCAGATTTTC       |

\* kindly provided by Morran *et al.* [78].

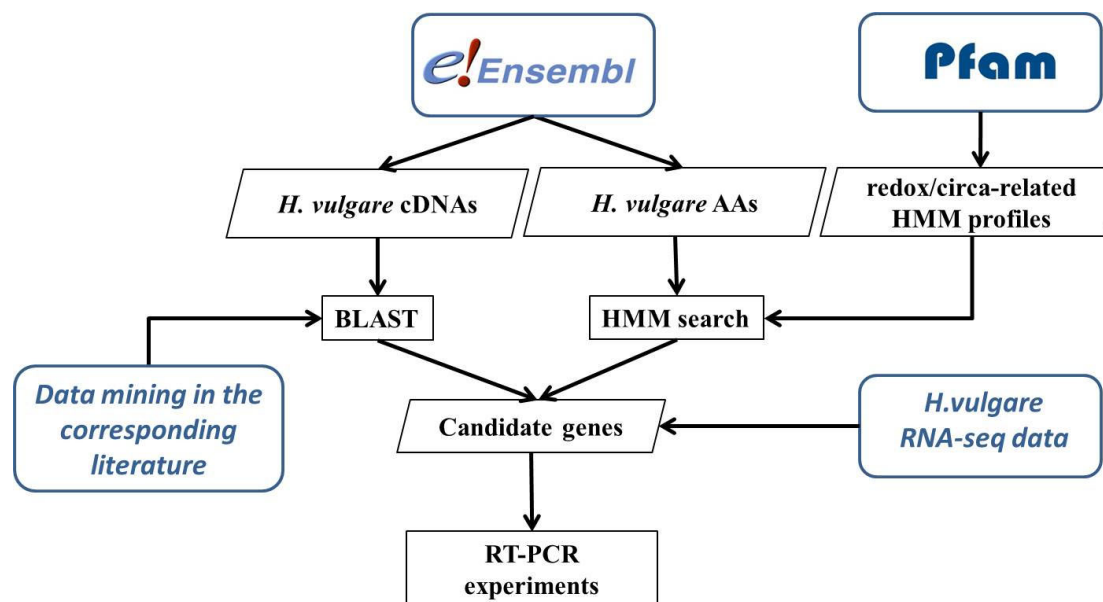

**Figure S1. Selection procedure of redox-, circadian rhythm- and far-red-dependent genes.** The *Hordeum vulgare* reference proteome was retrieved from Ensembl Plants FTP server ([ftp.ensemblgenomes.org](ftp://ftp.ensemblgenomes.org); release-41). The whole protein collection was subsequently scanned with the Hidden Markov Model (HMM)-based HMMER 3.0 software package (<http://eddylib.org/software/hmmer/>) [74] using redox and circadian-related HMM profiles of the Pfam 32.0 database (<ftp://ftp.ebi.ac.uk>) [75]. We also performed selection of genes responsive to far-red light with high expression changes (Galiba and Cattivelli, unpublished RNA-seq data).

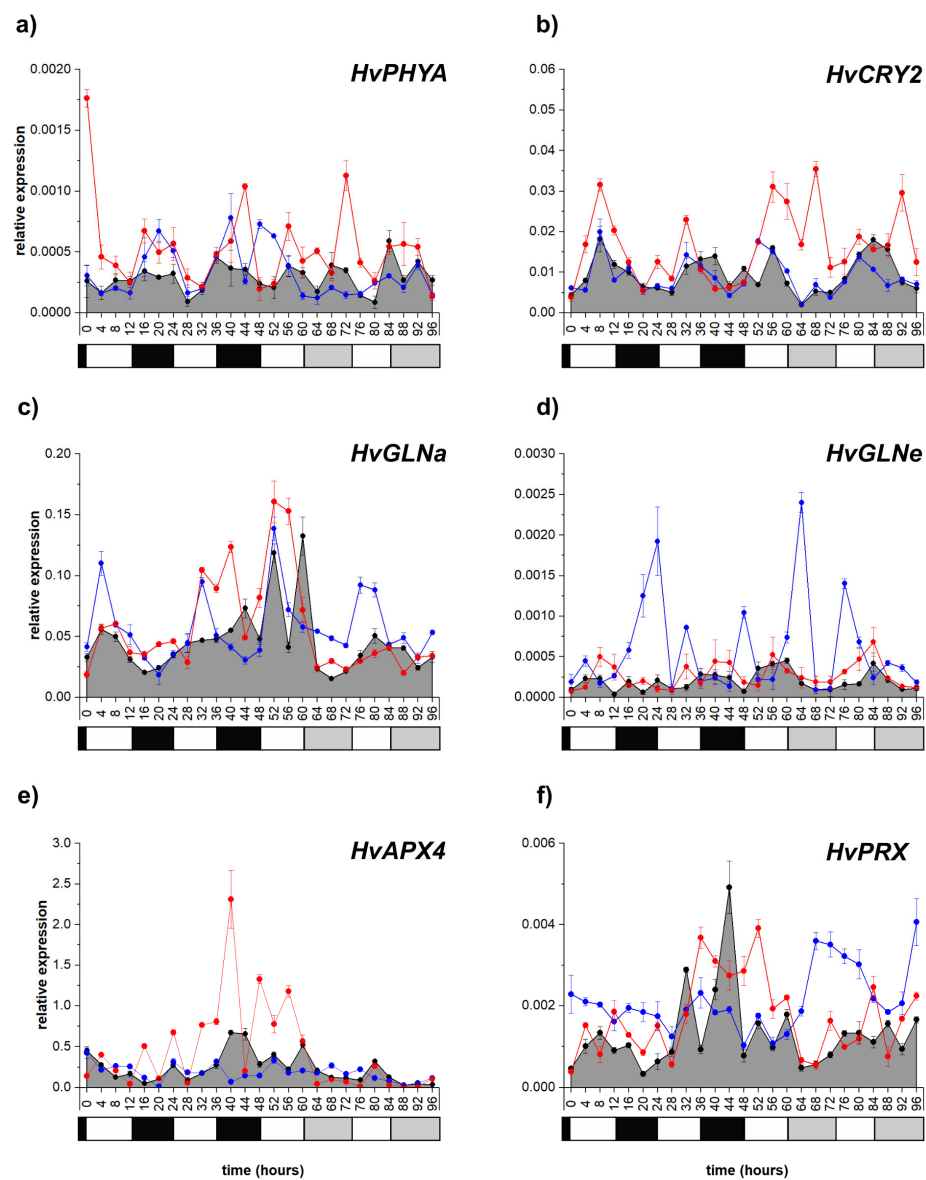

**Figure S2.** Expression patterns of *H. vulgare* phytochrome A (*HvPHYA*) (a), cryptochrome 2 (*HvCRY2*) (b), glutamine synthetase-a (*HvGLNa*) (c), glutamine synthetase-e (*HvGLNe*) (d), ascorbate peroxidase 4 (*HvAPX4*) (e) and peroxiredoxin (*HvPRX*) (f) coding genes under white, blue and far-red light illumination. Transcript levels were calculated with  $\Delta\text{Ct}$  method, expression data and error bars indicating standard deviations were calculated using three biological replicates. The following significant differences were calculated at  $p \leq 5\%$  level: *HvPHYA* — 0.00012; *HvCRY2* — 0.0035; *HvGLNa* — 0.013; *HvGLNe* — 0.00019; *HvAPX4* — 0.21; *HvPRX* — 0.00016.

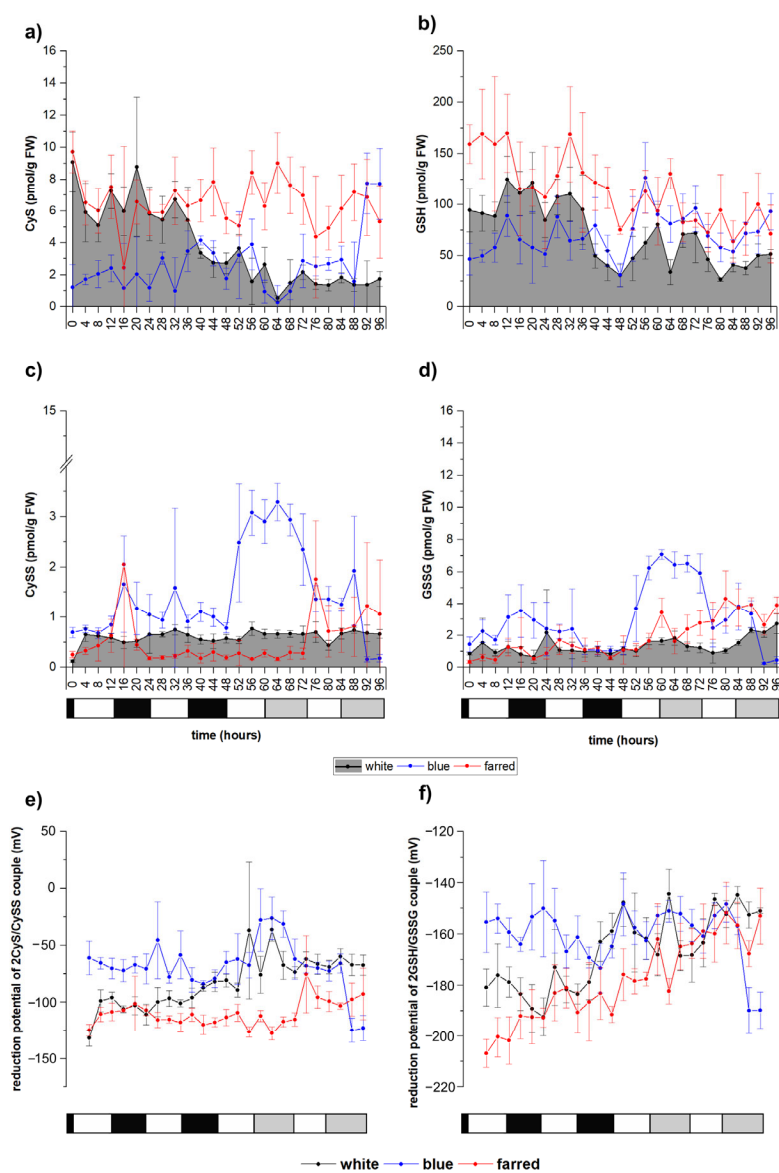

**Figure S3.** Changes in cysteine (a), glutathione (b), oxidized cysteine (c) and glutathione disulfide (d) content and reduction potential (E) of Cys/CySS (e) and GSH/GSSG (f) redox-couples in response to additional B/FR light treatment. Values on the X-axes show the time in hours after the start of the experiment; white and black bars below them indicate the light and dark periods, while grey bars indicate the subjective “night” period during constant light conditions. Data and error bars indicating standard deviations were calculated using three biological replicates. The following significant differences were calculated at  $p \leq 5\%$  level: Cys:  $-0.56$ ; GSH:  $-12.4$ ; CySS  $-0.16$ ; GSSG  $-0.23$ ;  $E_{2\text{Cys/CySS}} - 24.2$ ;  $E_{2\text{GSH/GSSG}} - 21.9$ .
